# Supplementary material for: In Vitro Modeling of Paraxial Mesodermal Progenitors Derived from Induced Pluripotent Stem Cells
Source: PubMed Central journal article supplement (PMC3480377; doi:10.1371/journal.pone.0047078), 2012-10-24

Figure S3

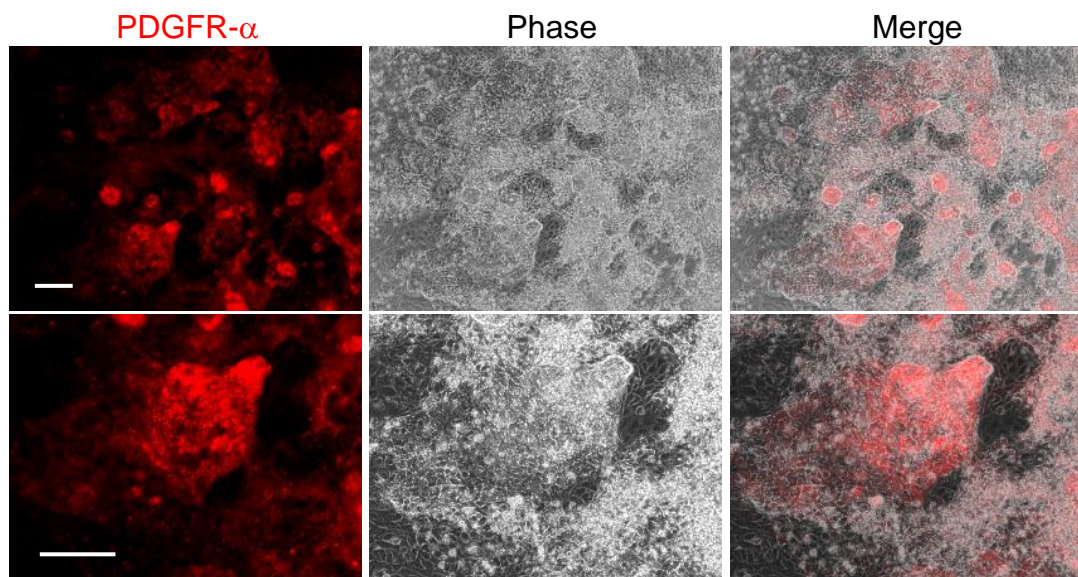

Supplement: pone.0047078.s003.pdf [file pone.0047078.s003.pdf]
